# Supplementary material for: Retrosynthesis with attention-based NMT model and chemical analysis of “wrong” predictions
Source: Royal Society of Chemistry journal article supplement (doi:10.1039/c9ra08535a), 2020-01-01
Supplement: c9ra08535a1.pdf [file c9ra08535a1.pdf]

## Supporting Information

### Retrosynthesis with Attention-Based NMT Model and Chemical Analysis of "Wrong" Predictions

Hongliang Duan,<sup>a</sup> Ling Wang,<sup>a</sup> Chengyun Zhang,<sup>a</sup> Lin Guo<sup>b</sup> and Jianjun Li<sup>\*a</sup>

<sup>a</sup>Artificial Intelligent Aided Drug Discovery Lab, College of Pharmaceutical Sciences, Zhejiang University of Technology, Hangzhou 310014, P. R. of China.

<sup>b</sup>Department of Pharmacy, The Affiliated Hospital of Xuzhou Medical University, Jiangsu Key Laboratory of New Drug Research and Clinical Pharmacy, Xuzhou Medical University, Xuzhou, Jiangsu, 221000, P.R. of China.

\*E-mail: [hduan@zjut.edu.cn](mailto:hduan@zjut.edu.cn) and [ljjianjun@zjut.edu.cn](mailto:ljjianjun@zjut.edu.cn)

**Table S1** Distribution of major reaction classes with the processed reaction data set

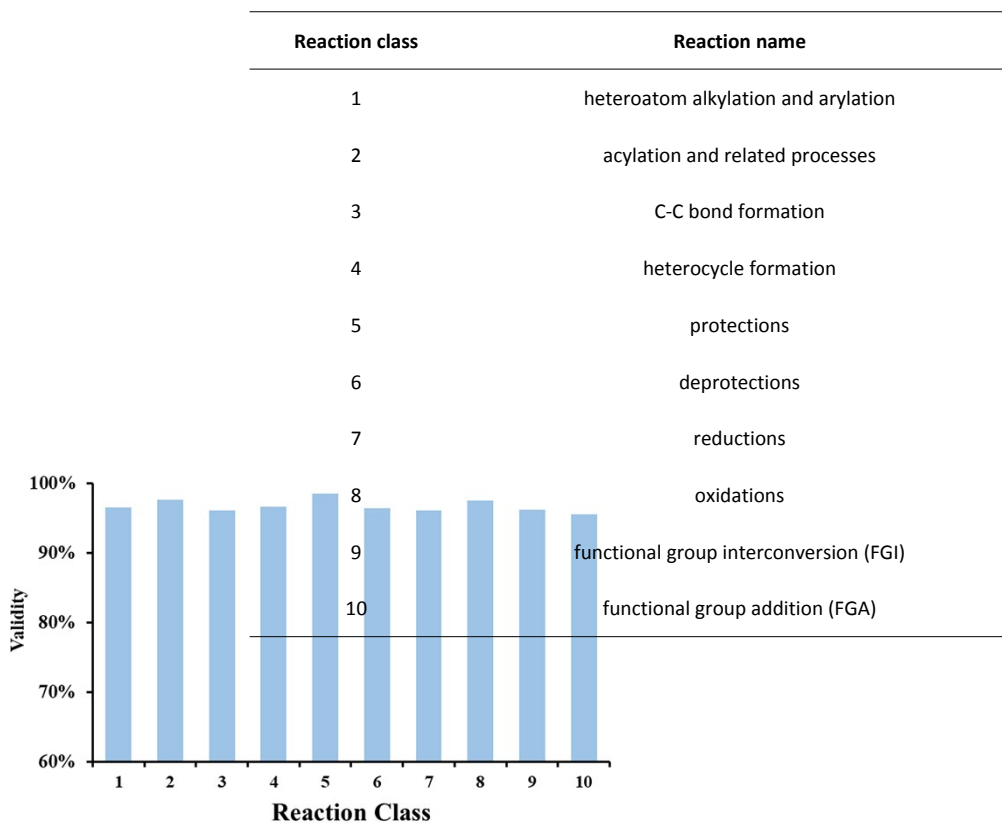

**Fig. S1** Validity of SMILES in each reaction class.
